# Supplementary material for: Effects of Fatty Acid Oxidation and Its Regulation on Dendritic Cell-Mediated Immune Responses in Allergies: An Immunometabolism Perspective
Source: Hindawi journal article supplement (doi:10.1155/2021/7483865), 2021-08-11

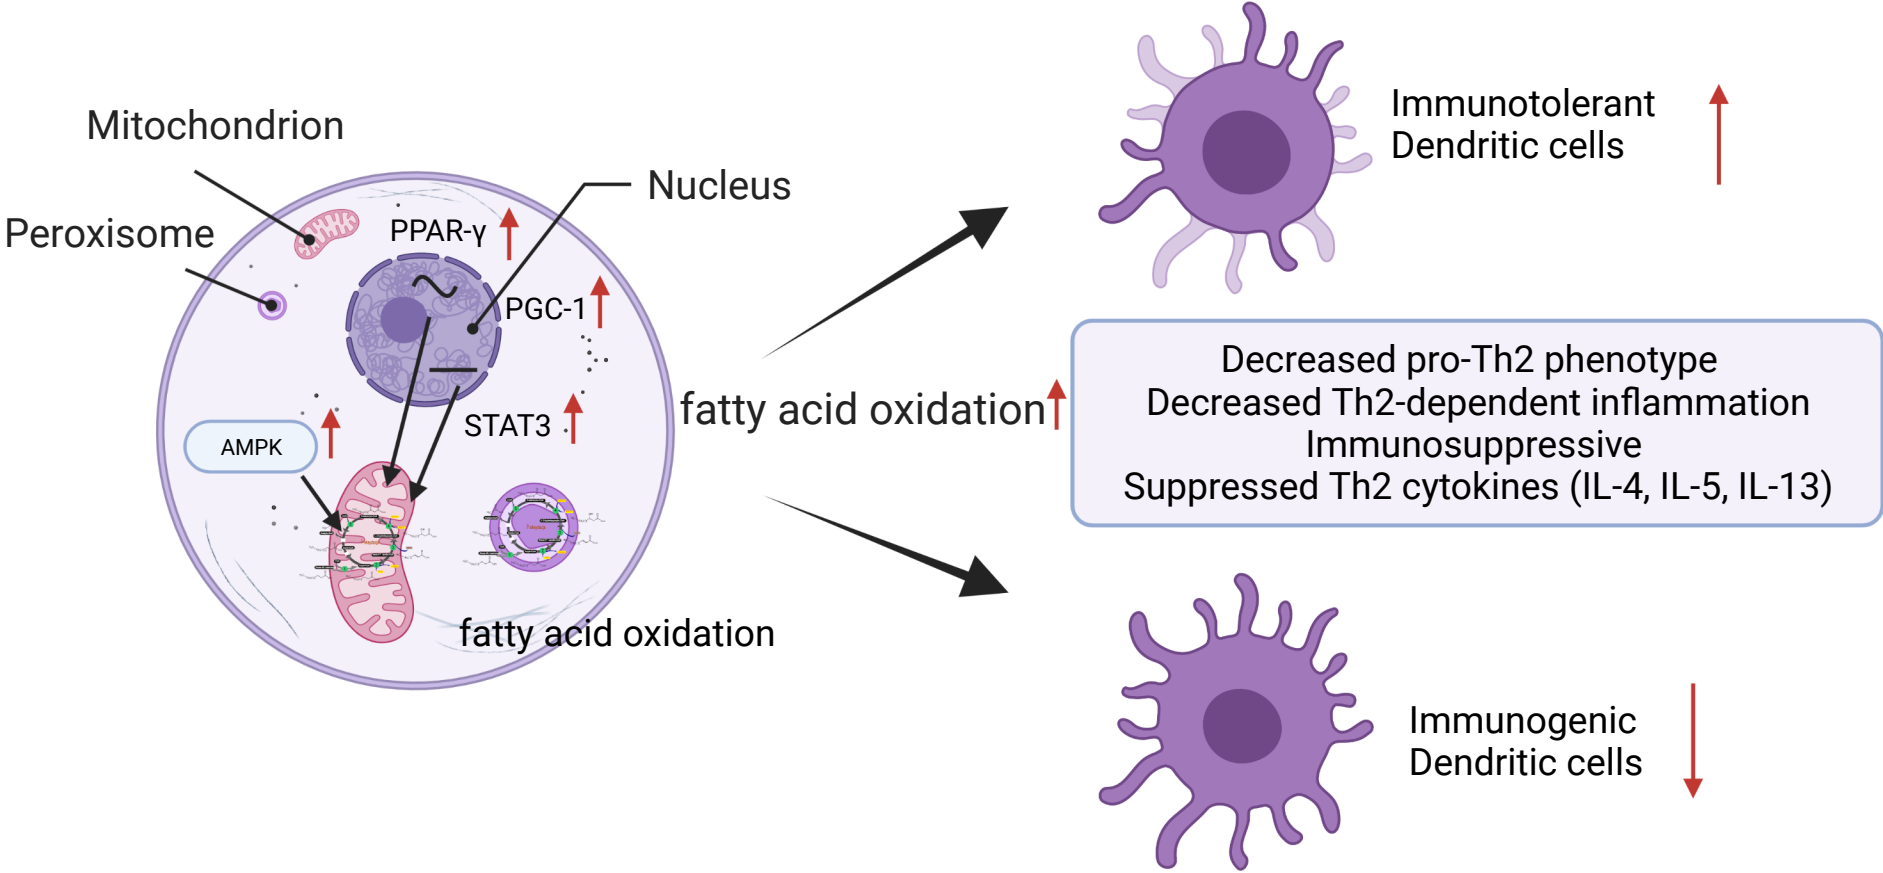

Supplement: f1 [file 7483865.f1.pdf]
